# Supplementary material for: Rhodamine dye transfer from hydrogel to nanospheres for the chemical detection of potassium ions
Source: Royal Society of Chemistry journal article supplement (doi:10.1039/c9an01079c), 2019-01-01
Supplement: c9an01079c1.pdf [file c9an01079c1.pdf]

Electronic Supplementary Information for

## Rhodamine Dye Transfer from Hydrogel to Nanospheres for The Chemical Detection of Potassium Ions

Wei Yang,<sup>a</sup> Jingying Zhai<sup>b</sup> and Xiaojiang Xie\*<sup>a</sup>

a. Department of Chemistry, Southern University of Science and Technology, 1088 Xili Xueyuan Blvd., Nanshan District, Shenzhen, 518055, China.

b. SUSTech Academy for Advanced Interdisciplinary Studies, Southern University of Science and Technology, 1088 Xili Xueyuan Blvd., Nanshan District, Shenzhen, 518055, China.

† Corresponding Author E-mail: [xiexj@sustech.edu.cn](mailto:xiexj@sustech.edu.cn)

### Contents:

|                                                      |    |
|------------------------------------------------------|----|
| Parameters for the simulated curves in Figure 2..... | S2 |
| Equation S1 and Fraction of D <sup>+</sup> .....     | S2 |
| Figure S1.....                                       | S2 |
| Figure S2.....                                       | S3 |
| Figure S3.....                                       | S3 |
| Figure S4.....                                       | S3 |
| Figure S5.....                                       | S4 |
| Figure S6.....                                       | S4 |

## Parameters for the simulated curves in Figure 2.

For the two-phases based system:

$$k_{12} = 10^{-3}, k_{12}' = 10^{-7}, k_{23} = 10^{-7}, V_1 = 1 \mu\text{L}, V_2 = 10 \text{ mL}, R_1^- = 1 \mu\text{mol}, R_3^- = 1 \mu\text{mol}, L_{\text{tot}} = 3 \mu\text{mol}, D_{\text{tot}}^+ = 1 \mu\text{mol}, [J^{n+}_{i \neq K+}] = 1 \text{ mM}$$

For the three-phases based systems:

$$k_{12} = 10^{-3}, k_{12}' = 10^{-7}, k_{23} = 10^{-7}, V_1 = V_3 = 1 \mu\text{L}, V_2 = 10 \text{ mL}, R_1^- = 1 \mu\text{mol}, R_3^- = 1 \mu\text{mol}, L_{\text{tot}} = 3 \mu\text{mol}, D_{\text{tot}}^+ = 1 \mu\text{mol}, [J^{n+}_{i \neq K+}] = 1 \text{ mM}$$

The **Normalized Absorbance** was calculated according to Equation S1, where  $[D^+]_0$  is the initial concentration of  $D^+$  in phase 1.

$$\text{Normalized Absorbance} = (D_{\text{tot}}^+ - V_1 [D^+]_1) / (D_{\text{tot}}^+ - V_1 [D^+]_0) \quad (\text{S1})$$

**Fraction of  $D^+$**  was calculated according to  $[D^+]_i V_i / D_{\text{tot}}^+$  for the  $i$ th phase.

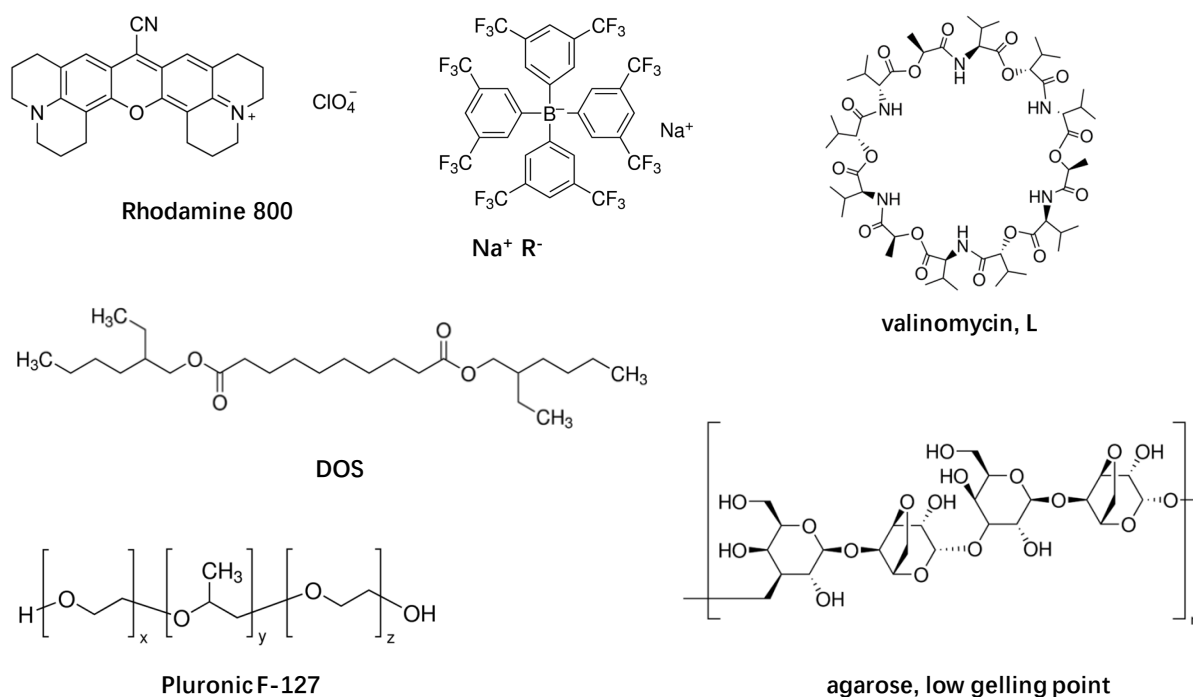

**Figure S1.** The chemical structures of the components used in the three-phases based detection system.

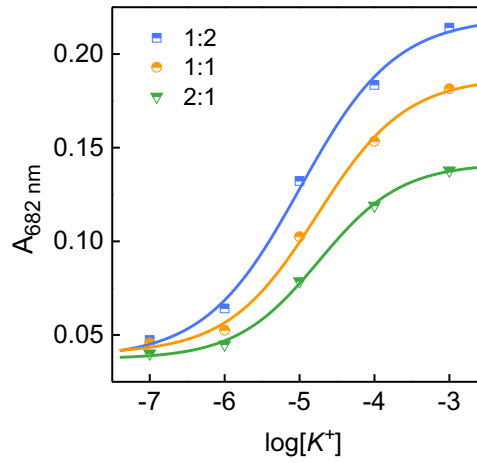

**Figure S2.** Calibration curves for the three-phases based system at different molar ratios of  $\text{Na}^+\text{R}^-$  in the hydrogel (phase 1) and the nanospheres (phase 3).

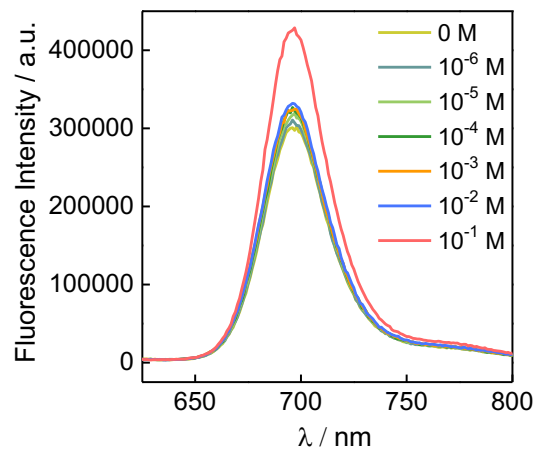

**Figure S3.** Fluorescence spectra of suspensions containing  $\text{D}^+$  and  $\text{R}^-$  doped nanospheres at various concentrations of choline as indicated.

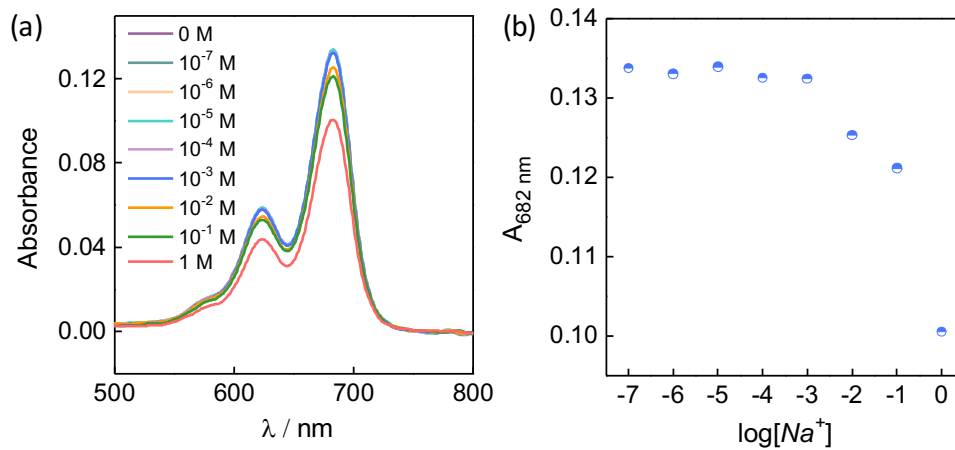

**Figure S4.** (a) Absorption spectra of the suspensions containing  $\text{D}^+$  and  $\text{R}^-$  doped nanospheres at various concentrations of  $\text{NaCl}$  as indicated. (b) The absorbance maxima at different logarithmic  $\text{Na}^+$  concentrations.

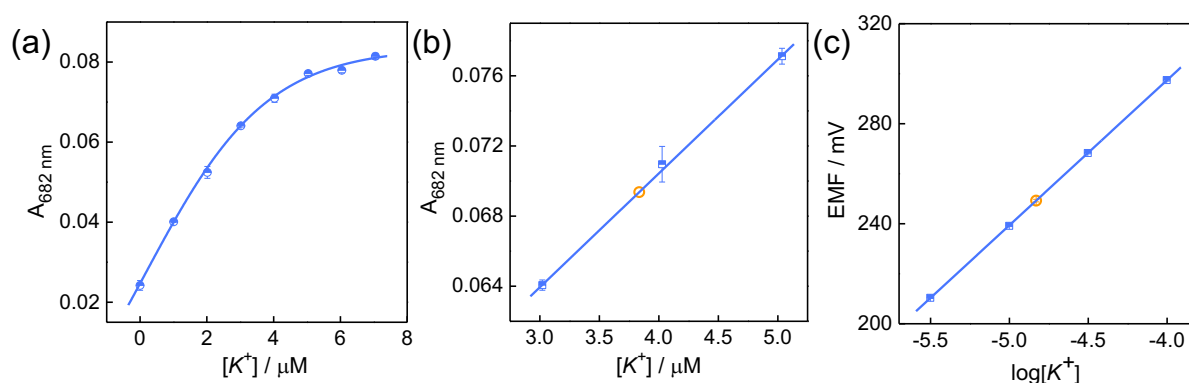

**Figure S5.** (a) Absorbance values at 682 nm as a function of  $K^+$  concentration for the three-phases system. Calibration curves for the determination of  $K^+$  level in Evian mineral water using the three-phases based method (b) and  $K^+$  ISEs (c). The Evian mineral water was diluted 4 times for the three-phases based method and detected directly for the ISE method. Error bars represent standard deviations of 3 measurements.

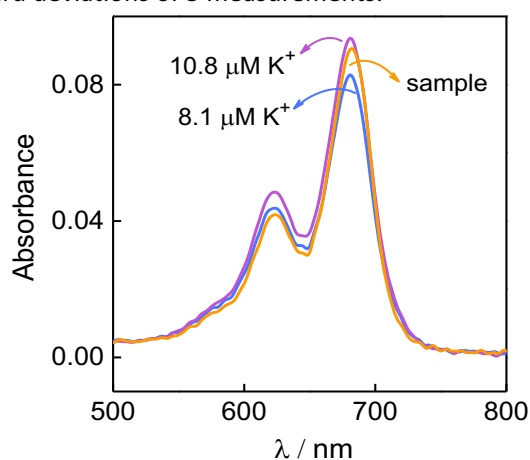

**Figure S6.** UV-vis absorption spectra of the liquid mixture in the three-phases based system after exposing the hydrogels to solutions containing the indicated  $K^+$  concentrations or the mineral water sample for 30 min. For the absorbance spectrum of sample, 1 mL of Evian mineral water and  $172 \mu\text{L}$   $\text{Na}^+\text{R}^-$  doped nanospheres were added to the centrifuge tube with agarose hydrogel. The absorbance value of sample at 682 nm is lower than that of the solution containing  $10.8 \mu\text{M } K^+$ .
